# Supplementary material for: The Lessons Learned from the Dusit Model and the Feasibility of Applying Integrated Health Services in Urban Areas: A Qualitative Study in Thailand
Source: Research Square preprint supplement (doi:10.21203/rs.3.rs-7691983/v1), 2025-12-08
Supplement: Supplementary file 1 [file b886a537afc430bd06ce9bd2.docx]

The Lessons Learned from the Dusit Model and the Feasibility of Applying Integrated Health Services in Urban Areas: A Qualitative Study in Thailand

**The full English language version of the questionnaire on interview & Focus group discussion**

Each interview was audio-recorded and lasted between 45 and 60 minutes.

**For administrators and coordinators:**

- Questions addressed strategic planning
- Network management
- Policy- and leadership-related challenges
- Opportunities in the local healthcare system

**For healthcare providers:**

- Questions focused on patient care
- Inter-unit collaboration, workforce capacity
- The implementation of digital health programs such as *Vajira@Home, Vajira Smile, V-Refer,* and *V-EMS*, as well as their training needs

**For patients:**

- questions examined their service experiences
- Access barriers
- Specific care needs
- Particularly among the elderly and those with chronic illnesses

The interview guide allowed flexibility for participants to reflect freely while ensuring systematic comparability across cases.
